# Supplementary material for: Li+ storage and transport in high-voltage spinel-type LiNi0.5Mn1.5O4 codoped with F− and Cu2+
Source: Royal Society of Chemistry journal article supplement (doi:10.1039/d2ta08199g), 2022-12-06
Supplement: d2ta08199g1.pdf [file d2ta08199g1.pdf]

Supplementary information

**Li<sup>+</sup> Storage and Transport in High-Voltage Spinel-  
LiNi<sub>0.5</sub>Mn<sub>1.5</sub>O<sub>4</sub> Codoped with F<sup>-</sup> and Cu<sup>2+</sup>**

Dae-wook Kim<sup>a,‡</sup>, Hiromasa Shiiba<sup>a,‡</sup>, Katsuya Teshima<sup>\* a, b</sup>, and Nobuyuki Zettsu<sup>\* a, b, c</sup>

a Department of Materials Chemistry, Faculty of Engineering, Shinshu University, 4-17-1 Wakasato, Nagano 380-8553, Japan

b Research Initiative for Supra-Materials, Shinshu University, 4-17-1 Wakasato, Nagano 380-8553, Japan

c Energy Landscape Architectonics Brain Bank (ELab2), Shinshu University, 4-17-1 Wakasato, Nagano 380-8553, Japan

‡These authors contributed equally

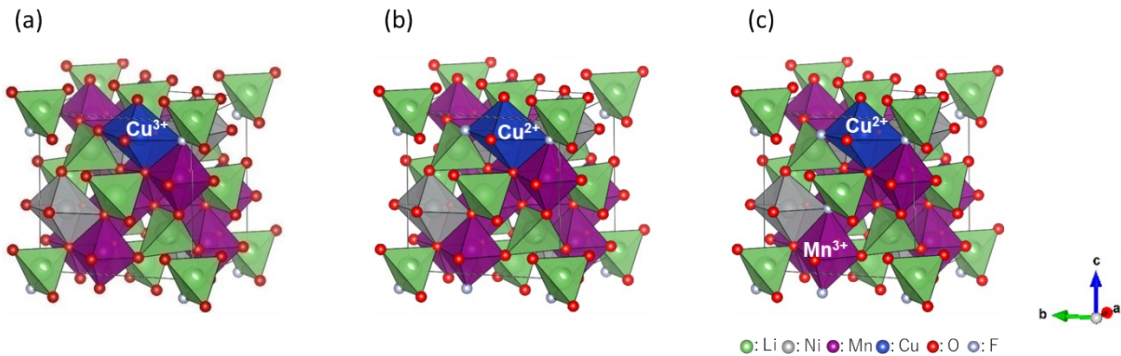

Figure S1. The DFT-calculated atomic arrangements of the most stable  $\text{LiNi}_{0.5}\text{Mn}_{1.375}\text{Cu}_{0.125}\text{O}_{4-x}\text{F}_x$  in 56-atom supercell structures for (a)  $x = 0.125$  (single  $\text{F}^-$  incorporation into the supercell,  $\text{Li}_8\text{Ni}_4\text{Mn}_{11}\text{Cu}_1\text{O}_{31}\text{F}_1$ ), (b)  $x = 0.250$  (double  $\text{F}^-$  incorporation,  $\text{Li}_8\text{Ni}_4\text{Mn}_{11}\text{Cu}_1\text{O}_{30}\text{F}_2$ ), and (c)  $x = 0.375$  (triple  $\text{F}^-$  incorporation,  $\text{Li}_8\text{Ni}_4\text{Mn}_{11}\text{Cu}_1\text{O}_{29}\text{F}_3$ ). For  $x = 0.125$ , the F and Cu atoms preferably occupied O-sites (24e sites instead of the 8c sites) and Mn-sites (12d) irrespective of the number of incorporated  $\text{F}^-$ . Fluorine atom preferentially occupied 24e sites where it simultaneously coordinates Ni, Mn, and Cu ions. For  $x = 0.250$ , the second F atom per unit cell coordinates preferentially to Cu to form octahedral  $\text{CuO}_4\text{F}_2$ . It forms a *trans*  $-\text{F}-\text{Cu}^{2+}-\text{F}-$  conformation along the b-axis. According to the ionic radius ratio rule, the formation energy of the *trans* conformation was lower than that of the *cis* form (by 0.13 eV). For  $x = 0.375$ , the incorporation of further  $\text{F}^-$  promoted the formation of octahedral  $\text{MnO}_4\text{F}_1$  and favored the reduction of  $\text{Mn}^{4+}$  to  $\text{Mn}^{3+}$ . The XRD experiments indicated lattice parameter changes that occurred with increasing  $\text{F}^-$  substitution. The relatively small increase of the lattice parameter in highly fluorinated  $\text{LNMCOf}_x$  may be from passivation of the oxygen deficiency by the  $\text{F}^-$  at the defect site. Our calculations predicted a crystal structure transition from a cubic to orthorhombic system with  $\text{F}^-$  substitution, accompanied by an anisotropic lattice dilatation along the b-axis, whereas further  $\text{F}^-$  incorporation mitigated this dilatation, and it recovered to cubic system. This behavior was explained by the decrease of bond length along the b-axis caused by the formation of *trans*  $-\text{F}-\text{Cu}^{2+}-\text{F}-$  conformation and the increase of bond length along the c-axis caused by the formation of Jahn-Teller distortion based on the  $-\text{F}-\text{Mn}^{3+}-$  bond formation. In other words, it is concluded that the anisotropic Jahn-Teller distortion produced by  $\text{Mn}^{3+}$  is distributed in three directions of *a*, *b* and *c* axes by the dual substitution of Cu and F. For  $x = 0.375$ , the enhancement of anisotropic lattice dilatation along the c-axis was ascribed to the Jahn-Teller distortion of  $\text{Mn}^{3+}$  associated with the formation of *trans*  $-\text{F}-\text{Mn}^{3+}-\text{F}-$  conformation. We further calculated the  $\text{Ni}^{2+}/\text{Mn}^{4+}$  antisite defect formation energies for the  $\text{LNMCOf}_x$  systems. The results were summarized below. The formation energy represented here showed positive value and was increased as the  $\text{F}^-$  substitution. These all results suggest that the symmetry transition was highly localized in a space near point of extrinsic defects  $\text{Cu}_{\text{Mn}}$  in the spinel framework. It is highly probable that randomization of the  $\text{Ni}^{2+}/\text{Mn}^{4+}$  is preferably occurred far from the  $\text{Cu}_{\text{Mn}}$  in association with the formation of Jahn-Teller  $\text{Mn}^{3+}$  distortion which is stabilized by the *trans*  $-\text{F}-\text{Cu}^{2+}-\text{F}-$  conformation.

| $\text{LiNi}_{0.5}\text{Mn}_{1.375}\text{Cu}_{0.125}\text{O}_4$                       | Ni/Mn antisite energy [eV] |   | $\text{LiNi}_{0.5}\text{Mn}_{1.375}\text{Cu}_{0.125}\text{O}_{3.625}\text{F}_{0.375}$ | Ni/Mn antisite energy [eV] |
|---------------------------------------------------------------------------------------|----------------------------|---|---------------------------------------------------------------------------------------|----------------------------|
| ①                                                                                     | -0.133                     | ① | Cu-Ni@1F                                                                              | 0.303                      |
| $\text{LiNi}_{0.5}\text{Mn}_{1.375}\text{Cu}_{0.125}\text{O}_{3.875}$                 | Ni/Mn antisite energy [eV] | ② | Cu-Ni@0F                                                                              | 0.445                      |
| ①                                                                                     | 0.120                      | ③ | Ni@1F-Mn@1F_1                                                                         | 0.692                      |
| $\text{LiNi}_{0.5}\text{Mn}_{1.375}\text{Cu}_{0.125}\text{O}_{3.875}\text{F}_{0.125}$ | Ni/Mn antisite energy [eV] | ④ | Ni@1F-Mn@1F_2                                                                         | 0.754                      |
| ①                                                                                     | 0.115                      | ⑤ | Ni@1F-Mn@2F                                                                           | 0.745                      |
| $\text{LiNi}_{0.5}\text{Mn}_{1.375}\text{Cu}_{0.125}\text{O}_{3.75}\text{F}_{0.25}$   | Ni/Mn antisite energy [eV] | ⑥ | Ni@0F-Mn@2F                                                                           | 0.330                      |
| ①                                                                                     | 0.320                      |   |                                                                                       |                            |

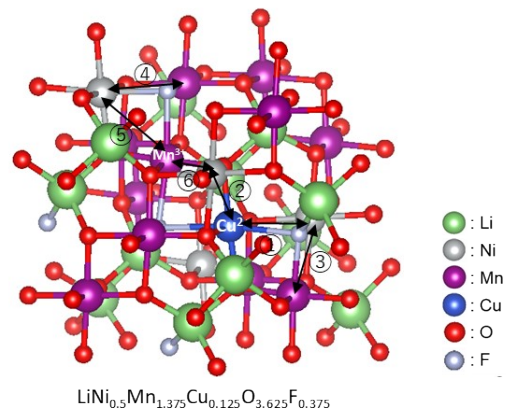

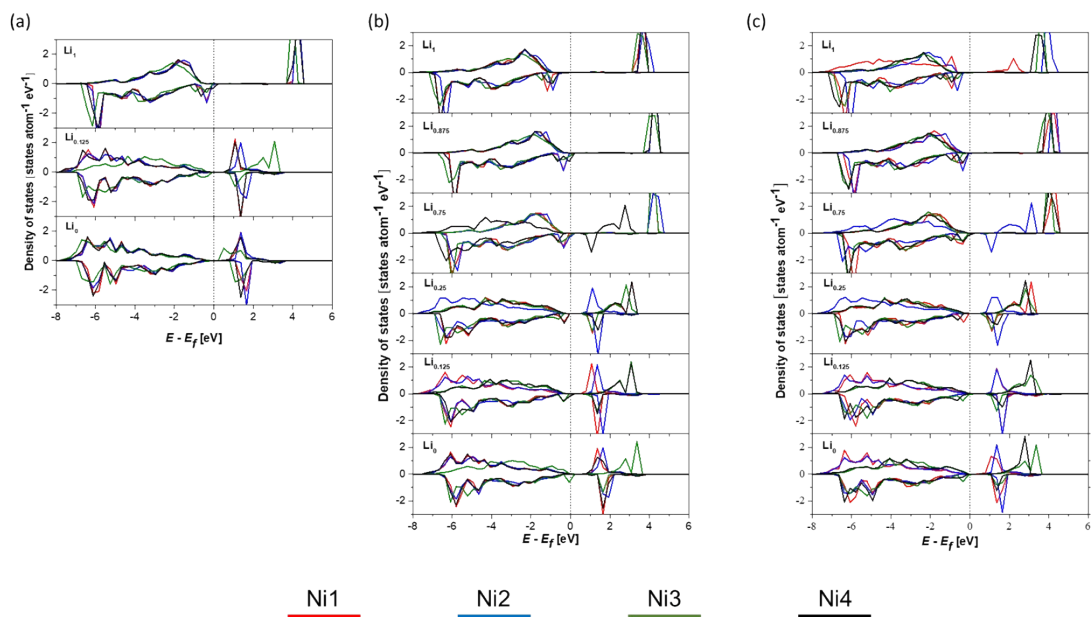

Figure S2. The DFT-calculated partial density of states (PDOS) for the Ni 3d in LNMCOF<sub>x</sub> materials with various Li contents (a)  $x = 0.125$ , (b)  $x = 0.250$ , and (c)  $x = 0.375$ .

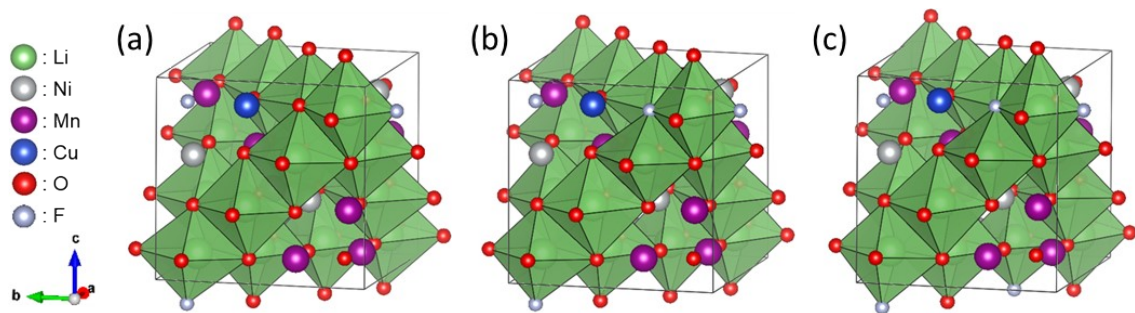

Figure S3. The DFT-calculated the most stable atomic configurations of  $L_{1.125}NMCOF_x$  ( $P4_332$  symmetry group) with various amounts of  $F^-$  per unit cell: (a)  $x = 0.125$ , (b)  $x = 0.250$ , and (c)  $x = 0.375$ . Extra  $Li^+$  ions occupy empty octahedral sites in the spinel lattice

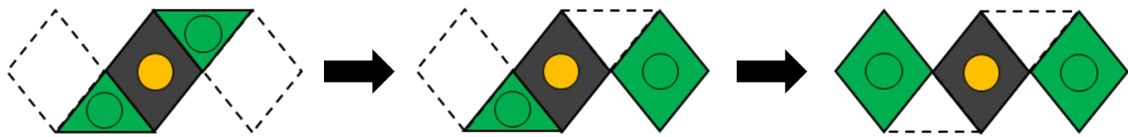

Figure S4. The plausible mechanism of extra  $Li^+$  ion diffusion behavior conducted by the DFT-calculation: The  $Li^+$  ions inserted into these sites are believed to promote the diffusion of nearest-neighbor  $Li^+$  ions occupying tetrahedral sites to adjacent octahedral sites with relatively large volumes under the action of ionic repulsion.

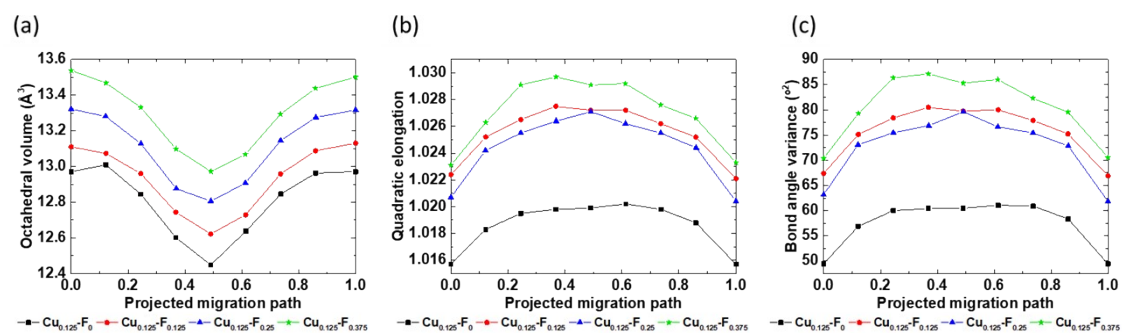

Figure S5. The calculated volume (a), quadratic elongation (b), and bond angle (c) variances for octahedral  $\text{Li}^+$  vacancy sites in the  $\text{Li}^+$  diffusion path of LNMCO and  $\text{LNMCOF}_x$ . The  $\text{Li}^+$  vacancy site space volume in  $\text{LNMCOF}_x$  system became larger as  $\text{F}^-$  doping amount. Thus,  $\text{F}^-$  doping contributed to site volume expansion to facilitate the storage of excess  $\text{Li}^+$ .

Table S1. The chemical compositions of the LNMCOF<sub>x</sub> crystals, as evaluated by inductively coupled plasma optical emission spectrometry and X-ray photoelectron spectroscopy.

|                        | Chemical composition                                                                                            |
|------------------------|-----------------------------------------------------------------------------------------------------------------|
| LNMO                   | Li <sub>1.01</sub> Ni <sub>0.49</sub> Mn <sub>1.50</sub> O <sub>4-δ</sub>                                       |
| LNMCO                  | Li <sub>1.00</sub> Ni <sub>0.49</sub> Mn <sub>1.49</sub> Cu <sub>0.01</sub> O <sub>4-δ</sub>                    |
| LNMCOF <sub>0.03</sub> | Li <sub>1.01</sub> Ni <sub>0.49</sub> Mn <sub>1.49</sub> Cu <sub>0.01</sub> O <sub>3.97</sub> F <sub>0.03</sub> |
| LNMCOF <sub>0.06</sub> | Li <sub>0.99</sub> Ni <sub>0.49</sub> Mn <sub>1.49</sub> Cu <sub>0.01</sub> O <sub>3.94</sub> F <sub>0.06</sub> |
| LNMCOF <sub>0.12</sub> | Li <sub>1.02</sub> Ni <sub>0.49</sub> Mn <sub>1.49</sub> Cu <sub>0.01</sub> O <sub>3.88</sub> F <sub>0.12</sub> |

Table S2. The contribution of Mn<sup>3+</sup>/Mn<sup>4+</sup> redox pair to specific capacity on the discharge curves

|                                                                                               | <sup>a</sup> Mn <sup>3+</sup> (%) |
|-----------------------------------------------------------------------------------------------|-----------------------------------|
| LiNi <sub>0.5</sub> Mn <sub>1.50</sub> O <sub>4</sub>                                         | 2.33                              |
| LiNi <sub>0.5</sub> Mn <sub>1.49</sub> Cu <sub>0.01</sub> O <sub>4</sub>                      | 2.62                              |
| LiNi <sub>0.5</sub> Mn <sub>1.45</sub> Cu <sub>0.01</sub> O <sub>4-x</sub> F <sub>x/4</sub>   | 2.74                              |
| LiNi <sub>0.5</sub> Mn <sub>1.49</sub> Cu <sub>0.01</sub> O <sub>4-x/2</sub> F <sub>x/2</sub> | 4.03                              |
| LiNi <sub>0.5</sub> Mn <sub>1.49</sub> Cu <sub>0.01</sub> O <sub>4-x</sub> F <sub>x</sub>     | 8.41                              |

<sup>a</sup>calculated from capacity contribution at 4 V plateau

Table S3. The DFT-calculated the average oxidation state of LNMCOF<sub>x</sub> crystals in response to delithiation process.

|          | Z  | 0     | 0.125 | 0.25  | 0.75  | 0.875 | 1     |
|----------|----|-------|-------|-------|-------|-------|-------|
| x= 0.125 | Ni | +2    | -     | -     | -     | +3.75 | +4    |
|          | Mn | +4    | -     | -     | -     | +4    | +4    |
|          | Cu | +3    | -     | -     | -     | +3    | +2    |
| x= 0.25  | Ni | +2    | +2    | +2.25 | +3.25 | +3.5  | +3.75 |
|          | Mn | +4    | +4    | +4    | +4    | +4    | +4    |
|          | Cu | +2    | +3    | +3    | +3    | +3    | +3    |
| x= 0.375 | Ni | +2    | +2    | +2.25 | +3.25 | +3.5  | +3.5  |
|          | Mn | +3.91 | +3.91 | +3.91 | +3.91 | +3.91 | +4    |
|          | Cu | +2    | +3    | +3    | +3    | +3    | +3    |

Table S4. Impedance parameters for the LNMO and LNMCOF<sub>x</sub> crystal-based cathode/Li cells.

|                        | D <sub>Li</sub> (cm <sup>2</sup> s <sup>-1</sup> ) | R <sub>ct</sub> (Ω) | R <sub>sf</sub> (Ω) |
|------------------------|----------------------------------------------------|---------------------|---------------------|
| Initial                |                                                    |                     |                     |
| LNMO                   | 3.45x10 <sup>-12</sup>                             | 34.24               | 19.08               |
| LNMCO                  | 7.83x10 <sup>-12</sup>                             | 13.87               | 23.47               |
| LNMCOF <sub>0.03</sub> | 9.24x10 <sup>-12</sup>                             | 9.98                | 19.44               |
| LNMCOF <sub>0.06</sub> | 1.12x10 <sup>-11</sup>                             | 9.81                | 18.75               |
| LNMCOF <sub>0.12</sub> | 7.46x10 <sup>-11</sup>                             | 9.78                | 19.76               |
| After 200 cycles       |                                                    |                     |                     |
| LNMO                   | 9.95x10 <sup>-13</sup>                             | 96.31               | 32.88               |
| LNMCO                  | 4.85x10 <sup>-12</sup>                             | 20.24               | 30.23               |
| LNMCOF <sub>0.03</sub> | 5.41x10 <sup>-12</sup>                             | 12.16               | 24.76               |
| LNMCOF <sub>0.06</sub> | 8.59x10 <sup>-12</sup>                             | 11.39               | 23.87               |
| LNMCOF <sub>0.12</sub> | 5.39x10 <sup>-11</sup>                             | 11.21               | 21.76               |
